# Supplementary material
Source: publisher figshare collection journal article supplement (https://karger.figshare.com/ndownloader/files/36428484)
Supplement: Supplementary file 1 [file 36428484]

**Supplement S9: Categorial factors on left ventricular systolic time intervals bias**

|  |  | | | LV-PEP | | | |  |  | | LV-ET | | | |
| --- | --- | --- | --- | --- | --- | --- | --- | --- | --- | --- | --- | --- | --- | --- |
|  | n |  | mean bias (m) and standard deviation (SD)  (EC-TTE)  M (SD) | | | limits of agreement  (m ± 1.96*SD) | p-value |  | | mean bias  (m) and standard deviation (SD)  (EC-TTE)  M (SD) | | | limits of agreement  (m ± 1.96*SD) | p-  value |
| Gestational age category |  |  |  | |  |  | .211 |  | |  | |  |  | .381 |
| < 28 weeks | 21 |  | 23.0 | | (15.4) | -7.1 to 53.1 |  |  | | 16.1 | | (29.7) | -42.2 to 74.3 |  |
| ≥ 28 weeks | 20 |  | 29.5 | | (12.9) | 4.2 to 54.9 |  |  | | 7.5 | | (27.6) | -46.6 to 61.6 |  |
| Birthweight category |  |  |  | |  |  | .369 |  | |  | |  |  | .674 |
| ≤ 1000g | 15 |  | 25.4 | | (15.1) | -4.3 to 55.0 |  |  | | 7.9 | | (31.0) | -53.0 to 68.7 |  |
| > 1000g | 26 |  | 29.4 | | (12.9) | 4.2 to 54.6 |  |  | | 11.5 | | (26.5) | -40.5 to 63.4 |  |
| Postnatal age category |  |  |  | |  |  | .139 |  | |  | |  |  | .072 |
| Day 1 | 11 |  | 30.3 | | (15.5) | -0.1 to 60.7 |  |  | | 16.8 | | (25.5) | -33.3 to 66.9 |  |
| Day 2 | 30 |  | 24.9 | | (11.3) | 2.7 to 47.0 |  |  | | 2.7 | | (29.3) | -54.8 to 60.2 |  |
| Presence of PDA |  |  |  | |  |  | .849 |  | |  | |  |  | .615 |
| No | 12 |  | 28.6 | | (8.8) | 11.6 to 45.6 |  |  | | 11.3 | | (27.7) | -43.0 to 65.6 |  |
| Yes | 29 |  | 27.6 | | (15.5) | -2.7 to 58.0 |  |  | | 8.3 | | (28.6) | -47.7 to 64.4 |  |
| Respiratory support  during measurement |  |  |  | |  |  | .471 |  | |  | |  |  | .084 |
|  |  |  | |  |  |  |  | |  | |  |  |  |
| IPPV | 6 |  | 33.3 | | (15.0) | 4.0 to 62.7 |  |  | | 28.8 | | (23.8) | -17.8 to 75.4 |  |
| CPAP/HFNC | 25 |  | 26.3 | | (14.3) | -1.7 to 54.4 |  |  | | 2.4 | | (30.0) | -56.3 to 61.2 |  |
| None | 10 |  | 26.9 | | (11.2) | 4.9 to 48.9 |  |  | | 19.5 | | (19.7) | -19.1 to 58.1 |  |

n, mean (standard deviation SD), limits of agreement of left ventricular (LV) pre-ejection period (PEP) and ejection time (ET), PDA patent ductus arteriosus, IPPV invasive intermittent positive pressure ventilation, non-invasive respiratory support with continuous positive airway pressure (CPAP) or high flow nasal canula (HFNC)
